# Supplementary material
Source: publisher figshare collection journal article supplement (https://gsapubs.figshare.com/articles/dataset/_/17209097)
Supplement: Supplementary file 1 [file 1]

## Sheet: Sheet1
Supplementary Material 2. Detailed stratigraphic ranges of brachiopod species from the Kapp Starostin Formation in each of the studied sections in Spitsbergen. First Appearance Datum (FAD) and Last Appearance Datum (LAD) are marked as stratigraphic distance from the base of the section in meter scale (m). The data below can be correlated on the stratigraphic columns in Figs. 3 and 4.
Brachiopod species	Spitsbergen sections
	Festningen		Trygghamna		Scheteligfjellet		Reinodden		Ahlstrandodden		Idodalen		Skansbukta A		Skansbukta B
	FAD	LAD	FAD	LAD	FAD	LAD	FAD	LAD	FAD	LAD	FAD	LAD	FAD	LAD	FAD	LAD
Fasciculatia groenwalli (Dunbar, 1962)	0	19	0	12	­	­	­	­	­	­	­	­	­	­	­	­
Arcullina polaris (Wiman, 1914)	0	19	0	12	­	­	0	5	­	­	0	9	0	5	0	5
Timaniella wilczeki (Toula, 1873)	0	19	0	12	0	1	0	5	0	8	0	9	0	5	0	5
Chaoiella neoinflata (Licharew, 1938)	0	19	­	­	­	­	­	­	0	8	­	­	­	­	0	5
Yakovlevia mammata (Keyserling, 1846)	0	19	3	21	­	­	­	­	­	­	­	­	­	­	­	­
Bruntonia granulifera (Toula, 1875)	0	19	­	­	­	­	0	5	0	8	­	­	­	­	0	5
Derbyia grandis Waagen, 1884	­	­	0	12	­	­	­	­	­	­	0	9	­	­	­	­
Waagenoconcha irginae (Stuckenberg, 1898)	­	­	0	12	­	­	­	­	0	8	0	9	0	5	­	­
Archboldevia impressa (Toula, 1875)	­	­	0	12	­	­	­	­	­	­	0	9	0	5	0	5
Kochiproductus porrectus (Kutorga, 1844)	­	­	­	­	­	­	0	5	­	­	­	­	­	­	­	­
Waagenoconcha artica Nakamura et al., 1992	­	­	­	­	­	­	0	5	0	8	0	9	0	5	­	­
Cancrinella cancrini (de Verneuil, 1845)	­	­	­	­	­	­	0	5	0	8	­	­	­	­	­	­
Linoproductus sp.	­	­	­	­	­	­	0	5	­	­	­	­	­	­	­	­
Megousia sp.	­	­	­	­	­	­	0	5	0	8	­	­	­	­	­	­
Streptorhynchus macrocardinalis (Toula, 1875)	­	­	­	­	­	­	­	­	0	8	­	­	0	5	­	­
Spiriferella protodraschei Lee and Shi in Lee et al., 2019	­	­	­	­	­	­	­	­	­	­	0	9	­	­	0	5
Athyris amdrupi Dunbar, 1962	­	­	­	­	­	­	­	­	­	­	­	­	0	5	­	­
Bruntonia maynci (Dunbar, 1955)	0	298	0	12	­	­	­	­	0	8	0	9	0	5	­	­
Anemonaria pseudohorrida (Wiman, 1914)	0	372	173	173	13	49	­	­	0	8	58	58	­	­	64	64
Spiriferella draschei (Toula, 1875)	­	­	­	­	0	1	­	­	­	­	­	­	0	5	0	88
Linoproductus janischewskianus Stepanov, 1934	111	111	­	­	­	­	­	­	­	­	­	­	­	­	­	­
Yakovlevia duplex (Wiman, 1914)	111	148	0	173	47	47	50	50	53	53	58	58	­	­	­	­
Fasciculatia striatoparadoxa (Toula, 1873)	111	340	341	346	11	49	­	­	95	95	­	­	­	­	88	88
Cleiothyridina pectinifera (Sowerby, 1841)	111	372	­	­	­	­	­	­	123	123	­	­	­	­	88	88
Megousia aagardi (Toula, 1875)	­	­	­	­	­	­	50	50	88	88	­	­	­	­	­	­
Spiriferella sp.	­	­	­	­	­	­	­	­	53	53	­	­	­	­	88	88
Paeckelmanella sp.	135	175	173	173	­	­	164	164	162	162	58	58	­	­	­	­
Lissochonetes superba (Gobbett, 1964)	135	372	206	230	31	48	­	­	123	123	130	130	72	72	88	88
Spiriferella loveni (Diener, 1903)	135	372	14	412	0	49	60	118	53	162	58	130	72	72	88	88
Waagenoconcha sp. A	148	234	­	­	­	­	­	­	­	­	­	­	­	­	­	­
Waagenoconcha wimani Fredericks, 1934	148	290	­	­	­	­	­	­	­	­	­	­	­	­	­	­
Svalbardathyris kotlukovi (Stepanov, 1936)	148	340	173	403	?	?	­	­	123	123	­	­	­	­	­	­
Kochiproductus plexicostatus Dunbar, 1955	148	372	173	173	?	?	­	­	53	184	­	­	­	­	88	88
Dyoros (Dyoros) mucronata (Shen et al., 2005)	175	340	206	230	­	­	­	­	88	88	­	­	­	­	­	­
Dyoros (Dyoros) spitzbergianus (Toula, 1874)	­	­	­	­	­	­	­	­	88	88	­	­	­	­	­	­
Licharewia cf. L. grewingki (Netschajew, 1911)	223	223	312	312	­	­	­	­	123	123	19	58	­	­	­	­
Stenoscisma sp.	223	223	312	312	47	47	­	­	­	­	­	­	­	­	­	­
Waagenoconcha payeri (Toula, 1873)	234	298	­	­	­	­	­	­	162	162	­	­	­	­	­	­
Kuvelousia weyprechti (Toula, 1873)	234	302	­	­	­	­	60	137	88	88	130	142	155	155	64	64
Aulosteges wangenheimi (de Verneuil, 1845)	­	­	­	­	­	­	118	118	­	­	­	­	­	­	­	­
Arctitreta kempei (Andersson in Wiman, 1914)	292	298	­	­	­	­	­	­	­	­	0	9	­	­	­	­
Yakovlevia greenlandica (Dunbar, 1955)	292	298	403	403	­	­	­	­	­	­	­	­	72	72	­	­
Stepanoviella curvata (Tolmatchew, 1912)	292	298	­	­	­	­	­	­	­	­	58	58	­	­	­	­
Thamnosia crassaurita (Sarycheva and Waterhouse, 1972)	292	298	341	346	­	­	­	­	­	­	134	142	­	­	­	­
Pseudosyringothyris borealis Gobbett, 1964	292	298	­	­	­	­	­	­	­	­	­	­	­	­	0	5
?Larispirifer sp.	302	302	403	412	­	­	232	232	162	190	­	­	­	­	­	­
Pleurohorridonia scoresbyensis Dunbar, 1955	315	340	­	­	­	­	­	­	­	­	­	­	­	­	­	­
Spiriferellinid gen. sp. indet.	328	328	412	412	­	­	­	­	190	190	­	­	­	­	­	­
Pterospirifer cordieri (Robert, 1845)	328	340	403	412	­	­	­	­	­	­	­	­	­	­	­	­
Anemonaria spitzbergiana (Toula, 1874)	340	340	­	­	­	­	­	­	­	­	­	­	­	­	­	­
Waagenoconcha irginaeformis Stepanov, 1937	340	372	­	­	­	­	­	­	­	­	­	­	72	72	88	88
Haydenella wilczeki (Toula, 1875)	372	372	­	­	­	­	­	­	­	­	­	­	­	­	­	­
Haydenella gefoensis (Licharew, 1937)	372	372	­	­	­	­	­	­	­	­	­	­	­	­	­	­
Megousia yakutica (Licharew, 1934)	372	372	­	­	­	­	­	­	­	­	­	­	72	72	­	­
Dielasma elongatum (von Schlotheim, 1816)	372	372	­	­	­	­	­	­	­	­	­	­	­	­	­	­
